# Supplementary material for: FLOPROS: an evolving global database of flood protection standards
Source: Copernicus journal article supplement (doi:10.5194/nhess-16-1049-2016), 2016-05-03
Supplement: Supplementary file 1 [file FLOPROS_Database_Design_&_Policy_layers_V1.xlsx]

## Sheet: FLOPROS_Design&Policy_layers_V1
Scale					Design layer (return period yrs)		Policy layer (return period yrs)			Values in green cells are inclued in the FLOPROS Shapefile
River stretch	City	Region	Country	Coastal/River	min (or only) value	max value	min (or only) value	max value	reliability	Reference	Type of reference	Additional information and notes
	Buenos Aires		Argentina	R	10				1	Fioravanti (2013)	Technical report	Urban drainage systems.
	Buenos Aires		Argentina	C	5	100			2	Barros et al. 2008	Specialist book	Not clear where it is specified in the source (but used in Linham and Nicholls, 2010)
			Australia	R/C			100		2	Smith (2004)	Technical report	Guidance, voluntary
	Brisbane		Australia	R/C			100		3	Zurich (2013)	Technical report	Standard for residential building/rebuilding (until 2011)
	Adelaide		Australia	C	100				1	Tucker et al. (2005)	Technical report	Design standard for seawalls and dykes. SLR and land subsidence are accounted for
			Austria WHOLE	R	100				2	Zurich, 2014	Technical report	General notation, inferred from 2013's floods. After that event missing protection is being integrated to meet the 100-year level in the whole Upper Austria.
			Austria (urban)	R			100		2	Galloway et al. (2006)	Technical report	Mandatory
			Austria (rural)	R			30		2	Galloway et al. (2006)	Technical report	Mandatory
Danube			Austria	R	100	1000				Ceframe (retrieved Mar. 2015)	Technical report	Plus freeboard for safety. 1000 is by hydro-power plants
Leitha			Austria	R	100				1	Ceframe (year?)	Technical report	100 (+ freeboard) where it is known
	Vienna		Austria	R			10000		2	Galloway et al. (2006)	Technical report	Mandatory
	Vienna		Austria	R	500				3	Zurich, 2014	Technical report	Thanks to the bypass channel Neue Donau
			Bangladesh (rural)	?	20				1	Bangladesh Water Development Board (cited in Bennett et al., 1994)	Technical report	Embankments
			Bangladesh (urban)	?	50	100			1	Bangladesh Water Development Board (cited in Bennett et al., 1994)	Technical report	Embankments
			Bangladesh (general)	R/C	10				1	Kymo Slager, Deltares	Personal communication	"When protected"
			Bangladesh (coastal)	C	25				1	Kymo Slager, Deltares	Personal communication	"When protected"
	Dhaka		Bangladesh	R	50				3	Asian development bank (2002)	Technical report	Embankment + road for one part of the city
	Dhaka		Bangladesh	R	50				1	Kymo Slager, Deltares	Personal communication
			Belgium (coastal)	C			1000		2	SAFECOAST (2008)	Technical report
	Kruibeke		Belgium	R	350				3	EU OURCOAST Project (retrieved Nov. 2014)	Institutional website	Creation of an innovative flood control area, that combines flood protection with habitat creation
		Flemish Region	Belgium (coastal)	C	1000				2	EC, 2009	Technical report	Mostly beach nourishments
			Belize	R/C	0		0		2	Meerman et al. (2011)	Technical report	"Belize does not have any proper flood defences"
	Cotonou		Benin	C						http://www-wds.worldbank.org/external/default/WDSContentServer/WDSP/AFR/2011/09/20/FBDD3EE9969819EB85257911006F32D7/1_0/Rendered/PDF/P1131450ISR0Di020201101316549674898.pdf	Technical webpage	Project to reduce the houses vulnerable to flood from 70 to 30 % in 2015
	União da Vitoria		Brazil	R			10		1	Tucci and Villanueva, 1999; Álvaro CARMO VAZ, 2000	Scientific study	General indication for the area
		Manitoba	Canada	R			100		3	Musy et al. (2014)	Specialist Book	Floodways
		British Columbia	Canada	?	200				3	Musy et al. (2014)	Specialist book	Floodways
		British Columbia	Canada	R	200				3	North Vancouver District (retrieved Nov. 2014)	Institutional website	"Safety standard"
		British Columbia	Canada	R/C	200		200		3	Province of British Columbia (1999)	Institutional document	British Columbia Floodplain Development Control Program
		British Columbia	Canada	R/C			200		3	Arlington Group (2010)	Technical report
	Winnipeg		Canada	R	700				3	Manitoba Government (retrieved Nov. 2014)	Institutional website	Red River Floodway
	Vancouver		Canada	R	200				3	Calbick et al., 2004	Technical report	300 km of dykes in the lower river Fraser
	Vancouver		Canada	C	200				1	City of Vancouver Community Services (2007)	Institutional report	Not clear where it is specified in the source (but used in Linham and Nicholls, 2010)
Red River			Canada	R	100	250			3	Red River Basin Commission (2010)	Technical report	For cities along the river (excluding Winnipeg, which has 700-years protection)
			China WHOLE
			China	R/C			20	50	3	Hong Kong Government (retrieved Nov. 2014)	project website	People's Republic of China national standard
			China	R/C	10	20			3	Zhang Hai-Lun (2004)	Technical report	General protection, by means of 250,000 km of levees and 85,000 upstream reservoirs. Protects about 400 M people
			China (urban)	R/C			20	200	3	China ministry of water resources (2005)	Institutional website	National Flood Protection Level Guideline. It is dependent of the population size
			China (industry)	R/C			20	200	3	China ministry of water resources (2005)	Institutional website	National Flood Protection Level Guideline. It is dependent of the population size
			China (rural)	R/C			10	100	3	China ministry of water resources (2005)	Institutional website	National Flood Protection Level Guideline. It is dependent of the population size
			China (rural)	R/C	2	20			3	Hong Kong Government (retrieved Nov. 2014)	project website
	Chengdu		China	R	200				2	Jha et al. (2012)	Specialist book	River-widening. Project of revitalization of some parts of the city.
	Chengdu		China	R			200		2	Sichuan Government (2011)	Institutional document
	Foshan		China	R	20	50			2	Zhang et al. (2008)	Journal article	Levees around urbanized areas
	Guangzhou		China	R/C	20				1	Nathwani et al. (2009)	Engineering book	Cannot access the source (reported in Linham and Nicholls, 2010)
	Hangzhou		China	?	50				2	Zhang and Gou (2011)	Technical report	Refence in chinese
	Hong Kong		China	R/C			50		3	Hong Kong Government (retrieved Nov. 2014)	project website
	Hong Kong		China	C	40	900			2	Yin (1991;1995)	Not available	Cannot access the source (reported in Linham and Nicholls, 2010)
	Jingdezhen		China	R	50				3	World Bank (2013)	Technical report	Government's funded dam + city dyke. Before protection was 20 years.
	Nanjing		China	R			200		3	Ministry of Water Resources of China (2001)	Institutional document
	Ningbo		China	R/C	20				2	Nathwani et al. (2009)	Engineering book	Cannot access the source (reported in Linham and Nicholls, 2010)
	Qingdao		China	R/C	20				2	Nathwani et al. (2009)	Engineering book	Cannot access the source (reported in Linham and Nicholls, 2010)
	Shanghai		China	C	100 (rural)	200 (urban)			3	Yin (2011)	Scientific study	510 km of sea walls protecting the city and the surrounding rural areas
	Shanghai		China	?	100				3	Ke (2014)	Scientific study	Based on a comparison of water levels and crest heights of floodwall along the Huangpu River.
	Shanghai		China	?	200				2	Chen (2014)	Scientific study	Refence in chinese
	Shanghai		China	?	200				2	China International Engineering Consulting Corporation (2003)	Technical report	Refence in chinese
	Shanghai		China	R			50	1000	2	Shangai Water Authority (retrieved March 2016)	Institutional document	Refence in chinese
	Tianjin		China	R/C	20				2	Nathwani et al. (2009)	Engineering book	Cannot access the source (reported in Linham and Nicholls, 2010)
		Hong Kong	China	R	10	200			2	Drainage Services dept. of Hong Kong (retrieved Nov. 2014)	Institutional website	Urban and rural drainage systems
Pearl river delta mainland			China	R/C	10	50			3	Tracy et al. (2007)	Journal article	Levees and reservoirs (info from 2007)
Shenzhen river			China	R	50				3	Chan et al. (2013)	Journal article	14 km in urban area
Yangtze river			China	R	100					Chinese Government (retrieved Nov. 2014)	Institutional website	Three Gorges Dam
		Southern Taiwan	China (Taiwan)	R	150				2	Huang et al. (2015)	Scientific study	Chiuliao 1st levee (part of a levee system): reliability investigated by a scientific study.
	Taipei		China (Taiwan)	R	50	200			3	Taipei city government, 2001	Institutional report	130 km of levees for major to minor tributary rivers, with freeboard
			Croatia (rural)	R/C			20	50	2	van Alphen and Lodder (2006)	Journal article
			Croatia (urban < 30,000 inhabitants)	R/C			100		2	van Alphen and Lodder (2006)	Journal article	Urban below 30,000 inhabitants
			Croatia (urban > 30,000 inhabitants)	R/C			1000		2	van Alphen and Lodder (2006)	Journal article	Urban below 30,000 inhabitants
	Zagreb		Croatia	R	100				3	Bonacci and Ljubenkov (2008)	Journal article	To protect Zagreb from the Sava River floods, a system was built and set in operation.
	Prague		Czech republic	R	100				3	Floodmaster intreanet (retrieved Nov. 2014)	Technical webpage	Achievement of the "Action Plan of Flooding in the Elbe"
	Prague (Troja castle)		Czech republic	R	20	200			2	Povodí Vltavy, s. e. (2007)	Institutional document	Solid constructions (damming of the stream), mobile barriers. From Q20 to Q2002+30 cm
	Prague (Zbraslav)		Czech republic	R	20	100			2	Povodí Vltavy, s. e. (2007)	Institutional document	Solid constructions (damming of the stream), mobile barriers.From Q5-20 to Q100+30 cm
	Štěchovice		Czech republic	R	20	50			2	Povodí Vltavy, s. e. (2007)	Institutional document	Damming of the stream, mobile barriers. From Q10 to Q50 at Vltava river, from Qmin to Q20 river Kocába, decrease of area under flood risk by 7.5 ha
	Kralupy nad Vltavou		Czech republic	R	20				2	Povodí Vltavy, s. e. (2007)	Institutional document	Adjustment of the stream, solid constructions (damming of the stream), mobile barriers, to increase protection from Qmin to Q20 river Vltava; decrease of area under flood risk by 57.3 ha
	Lovosice		Czech republic	R	100				3	http://intranet.floodmaster.de/wiki/test99	Technical webpage	Achievement of the "Action Plan of Flooding in the Elbe"
Dyje			Czech republic	R	20	100			2	Ceframe (retrieved Mar. 2015)	Technical report	Approximated dykes' capacity, they vary for different stretches
Morava			Czech republic	R	20	100			2	Ceframe (retrieved Mar. 2015)	Technical report	Approximated dykes' capacity, they vary for different stretches
			Denmark (coastal)	C			50	1000	1	SAFECOAST (2008)	Technical report
			Denmark (coastal)	C			NA			EC, 2009	Institutional report	"Coastal defence measures to protect against flooding, erosion and extreme weather events are only undertaken when there is a concrete need for it" "Wait and see" approach. In case nourishments and soft measures are favoured.
	Copenhagen		Denmark	R/C	NA					Copenhagen (2011)	Institutional report	Copenhagen Climate Adapatation Act. Does not specify any protection level.
	Copenhagen		Denmark	R/C			100		1	City of Copenhagen, 2012	Institutional report	Copenhagen Cloudburst Management Plan. A variety of measures is recommended.
	Copenhagen		Denmark	C						Hallegatte et al. (2011)	Scientific study	No standard specified. The authors specify that the city is "very well protected" fro the risk of storm surges
	Copenhagen		Denmark	?	120				1	Hallegatte et al. (2008)	Technical report	Not clear where it is specified in the source (but used in Linham and Nicholls, 2010)
	Alexandria		Egypt	?	20				2	Nathwani et al. (2009)	Engineering book	Cannot access the source (reported in Linham and Nicholls, 2010)
			Finland (coastal)	C			100		2	Hilpert, K., et al. (2007)	Technical report	Zones subject to floods below 100 years magnitude shall serve as natural flood plains
	Helsinki		Finland	C	90				2	Lehtonen and Luoma (2006)	Scientific study	Based on the statement that a 100-year coastal flood would still cause damage.
Rhone and Loire river basins			France	?	100				2	Erik Mosselman (2014, personal comm.)	Personal communication	Deltares expert interviewed in 2014
			Germany WHOLE
			Germany (rural)	R			0		1	Musy et al. (2014)	Specialist Book
			Germany (urban)	R			100		2	Zurich, 2014	Technical report	General protection. Some places have much higher protection, like 1000 or 10000
			Germany (coastal)	C			100		3	Hilpert, K., et al. (2007)	Technical report	Zones subject to floods below 100 years magnitude shall serve as natural flood plains
			Germany (coastal)	C			100		2	SAFECOAST (2008)	Technical report
		Brandenburg	Germany	R			100		2	Ceframe (retrieved Mar. 2015)	Technical report	Designated standard for retention areas
		Sachen-Anhalt	Germany	R			100		2	Ceframe (retrieved Mar. 2015)	Technical report	Designated standard for retention areas
		Sachsen	Germany	R	5	500			3	Sächsisches Staatsministerium für Umwelt und Landwirtschaft (2005)	Institutional document	Highly detailed information about existing flood protection standards, often with ranges, with high-spatial resolution to the district scale
		Sachsen	Germany	R			20	200	3	Sächsisches Staatsministerium für Umwelt und Landwirtschaft (2005)	Institutional document	Highly detailed information about flood protection standards that the regional government aims to, often with ranges, with high-spatial resolution to the district scale
		Schleswig-Holstein	Germany	C	100				3	EC, 2009	Technical report	Schleswig-Holstein Master Plan for Coastal Defence (2001). Dykes, sand nourishments, and salt marshes management.
		Hamburg	Germany	R	400				3	EC, 2009	Technical report	Master plan (1990, never published). New one scheduled for period 2013-2035
	Hamburg		Germany	R	650				2	Linham et al. (2010)	Technical report	The authors in turn cite a personal communication (Much?)
	Dresden		Germany	R	500				3	Zurich, 2014	Technical report	The Weisseritz river proved very dangerous in 2002, since then protection was increased
	Dresden		Germany	R	100				3	http://intranet.floodmaster.de/wiki/test99	Technical webpage	Achievement of the "Action Plan of Flooding in the Elbe"
	Hitzacker		Germany	R	100				3	http://intranet.floodmaster.de/wiki/test99	Technical webpage	Achievement of the "Action Plan of Flooding in the Elbe"
Isar river - Munich to Deggendorf			Germany	R	100				3	Zurich, 2014	Technical report
Isar river confluence into the Danube			Germany	R	30				3	Zurich, 2014	Technical report	Levee that breached in 2013
Inn river at Rosenheim			Germany	R	100				3	Zurich, 2014	Technical report	Level of the new structures, inferred from the type of flood they withstood in June 2013
Inn river confluence into the Danube, by Passau			Germany	R	500				3	Zurich, 2014	Technical report	New structures
Inn, upstream of Passau			Germany/Austria	R	100				3	Zurich, 2014	Technical report	Managed by hydropower companies
Rhine- from Basel to Karlsruhe			Germany	R	1000				2	te Linde et al. (2011); ICPR (2005)	Journal article	Estimated protection level
Rhine- from Karlsruhe to Mainz			Germany	R	200				2	te Linde et al. (2011); ICPR (2005)	Journal article	Estimated protection level
Rhine- from Mainz to Bonn			Germany	R	200				2	te Linde et al. (2011); ICPR (2005)	Journal article	Estimated protection level
Rhine- from Bonn to Duisburg			Germany	R	200				2	te Linde et al. (2011); ICPR (2005)	Journal article	Estimated protection level
Rhine- from Duisburg to Lobith			Germany	R	500				2	te Linde et al. (2011); ICPR (2005)	Journal article	Estimated protection level
	Kumasi		Ghana	R	0				3	Jha et al., 2012	Specialist book	The city is flooded yearly
			Greece (coastal)	C	NA					EC, 2009	Technical report	Initiatives are "ad-hoc" on local level.
			Hungary	R			100		2	Ceframe (retrieved Mar. 2015)	Technical report	Design flood level parameter for dykes
			India	R/C			50	100	1	Agarwal and Singh (2007)	Specialist Book	Central Water Commission design recommendations for flood reservoirs and waterways
	Kolkata		India	R	20				2	Nathwani et al. (2009)	Engineering book	Cannot access the source (reported in Linham and Nicholls, 2010)
	Mumbai		India	C	20				2	Nathwani et al. (2009)	Engineering book	Cannot access the source (reported in Linham and Nicholls, 2010)
			Indonesia (rural)	R/C			25		2	van Alphen and Lodder (2006)	Journal article
			Indonesia (urban)	R/C			50	100	2	van Alphen and Lodder (2006)	Journal article
			Indonesia (urban)	R/C			2	25	3	Indonesian Minister of Public Works (2014)	Institutional document	Detailed procedures how to conduct infrastructure project (from study, design and building) related to drainage system in city areas
			Indonesia	R			25	50	2	DKI Jakarta (2009)	Institutional document	25 years for natural embankments, 50 years for artificial ones.
	Jakarta		Indonesia	R	100				2	Jha et al., 2012	Specialist book	Western and Eastern floodways, intercepting rivers flowing to Jakarta and diverting water to the ocean.
	Jakarta		Indonesia	R	NA				2	http://www.worldbank.org/projects/P111034/jakarta-urgent-flood-mitigation-project?lang=en	Project website	Jakarta Urgent Flood Mitigation Project, started in reaction to shorcomings in the maintenance of the two waterways above, which lowered their efficiency and standard.
Brantas river basin			Indonesia	R	50				2	Wikipedia (retrieved March 2015)	Wikipedia	Sutsami dams
Brantas river basin			Indonesia	R	1000				3	SatriaMarsudi (retrieved on March 2015)	Technical report	Bendungan Sutami spillway (system of three dams). Offers protection to the basin and to the big city of Surabaya
			Ireland WHOLE
			Ireland (coastal)	C			200		1	http://www.opw.ie/en/media/Planning%20System%20and%20Flood%20Risk%20Management%20Guidelines.pdf	Technical website	Planned standards for new buildings, with an "allowance" for climate change. 2009
			Ireland (river)	R			100		1	http://www.opw.ie/en/media/Planning%20System%20and%20Flood%20Risk%20Management%20Guidelines.pdf	Technical website	Planned standards for new buildings, with an "allowance" for climate change. 2009
			Ireland	R/C	20	200			3	O'Donovan (2014)	Technical report	Hard defences
	Dublin		Ireland	C	70				2	Cooke et al. (2005)	Specialist book
	Dublin		Ireland	C	120				1	Dublin city council at http://www.dublincity.ie/main-menu-services-water-waste-and-environment-water-projects/coastal-flooding-projects	Institutional website	Building design for a promenade in the coast
	Cork		Ireland	R/C	200				1	http://www.irishexaminer.com/ireland/work-starts-next-year-on-corks-euro50m-flood-protection-plan-283679.html	Newspaper article	Hard defences works to start in 2015. For both tide and river floods. Protection level not explicit.
	Skibbereen		Ireland	R	200				2	http://www.irishexaminer.com/ireland/work-starts-next-year-on-corks-euro50m-flood-protection-plan-283679.html	Newspaper article	Hard defences works to start in 2015. Protection level not explicit.
	Waterford		Ireland	R	100				3	O'Donovan (2014)	Technical report
	Waterford (coastal)		Ireland	C	200				3	O'Donovan (2014)	Technical report
			Israel	?			2	100	1	Shamir (2005) personal comm., as cited in Galloway et al. (2006)	Personal communication
			Italy (coastal)	C	NA				1			Coastal protection is the responsibility of the regions.
			Italy (general)	R/C			0		1			No info retrievable even in Italian: likely no country-scale protection standards
	Naples		Italy	C	20	50			1	Vicinanza, as in Linham et al. (2010)	Personal communication	The authors in turn cite a personal communication
	Venice (coastal)		Italy	C	350				2	http://ec.europa.eu/ourcoast/index.cfm?menuID=7&articleID=9	Institutional website	System of measures against sea storms.
			Japan WHOLE
			Japan (rural)	R			30		2	Kazama et al., 2010	Specialist Book	General indication, regional differences are mentioned to be likely
			Japan (urban)	R			70		2	Kazama et al., 2010	Specialist Book	General indication, regional differences are mentioned to be likely
			Japan (coastal)	C			10000		1	Ode (2005) personal comm., as in Galloway et al. (2006)	Personal communication	Voluntary (for areas with "large populations")
			Japan (river)	R			200		1	Ode (2005) personal comm., as in Galloway et al. (2006)	Personal communication	Voluntary
	Osaka-Kobe		Japan	C	300				1	Nicholls et al. (2008)	Technical report	Not clear where the authors get the info from
	Tokyo		Japan	C	1000				1	Nicholls et al. (2008)	Technical report	Not clear where the authors get the info from
	Nagoya		Japan	C	100				1	Nathwani et al. (2009)	Engineering book	Cannot access the source (reported in Linham et al., 2010)
	Toliara		Madagascar	R	100				1	http://www.maccaferri.com.au/webfiles/MaccaferriAu/files/ZAF-CH-046-Tulear-Eng-Rev00.pdf	Corporate website	Physical protection.
			Mozambique	R	5	20			2	Carmo Vaz (2000)	Technical report	Levees in flood plains of several rivers
	Maputo		Mozambique	C	10	100			1	Mather, as in Linham and Nicholls (2010)	Personal communication	The authors in turn cite a personal communication
			Netherlands WHOLE
			Netherlands (river)	R	1250
			Netherlands (river and coastal)	R/C			100	100000	3	Deltaprogramma (2015); van der Most et al. (2014)	Institutional document	Deltaprogramma 2015: Levels of protection for each coastal and river stretch
		Drenthe	Netherlands	R/C	1250				3	Ministry of transport, public works and water management (2010)	Institutional document	Dyke rings
		Flevoland	Netherlands	R/C	4000				3	Ministry of transport, public works and water management (2010)	Institutional document	Dyke rings
		Friesland	Netherlands	R/C	4000				3	Ministry of transport, public works and water management (2010)	Institutional document	Dyke rings
		Gelderland	Netherlands	R/C	2000				3	Ministry of transport, public works and water management (2010)	Institutional document	Dyke rings
		Groningen	Netherlands	R/C	4000				3	Ministry of transport, public works and water management (2010)	Institutional document	Dyke rings
		Limburg	Netherlands	R/C	250				3	Ministry of transport, public works and water management (2010)	Institutional document	Dyke rings
		Noord-Brabant	Netherlands	R/C	1250				3	Ministry of transport, public works and water management (2010)	Institutional document	Dyke rings
		Noord-Holland	Netherlands	R/C	10000				3	Ministry of transport, public works and water management (2010)	Institutional document	Dyke rings
		Overijssel	Netherlands	R/C	1250				3	Ministry of transport, public works and water management (2010)	Institutional document	Dyke rings
		Utrecht	Netherlands	R/C	1250				3	Ministry of transport, public works and water management (2010)	Institutional document	Dyke rings
		Zeeland	Netherlands	R/C	4000				3	Ministry of transport, public works and water management (2010)	Institutional document	Dyke rings
		Zuid-Holland	Netherlands	R/C	10000				3	Ministry of transport, public works and water management (2010)	Institutional document	Dyke rings
Rhine			Netherlands	R	1250				2	te Linde et al. (2011); Silva and van Velzen (2008)	Journal article
			New Zealand WHOLE	R/C			100		1	http://www.gw.govt.nz/floodplain-management-planning/	Institutional website	General information, maybe not reliable
Hutt river basin			New Zealand	R	440				3	New Zealand Government (retrieved on Nov. 2014)	Institutional report	Hutt River Floodplain Management Plan, 2001
Otaki river basin			New Zealand	R	20	100			3	Wellington Regional Council (retrieved on Nov. 2014)	Institutional report	Otaki floodplain management plan
Waikanae river basin			New Zealand	R	100				3	Greater Wellington Regional Council (retrieved on Nov. 2014)	Institutional report	Plan to reconstruct a stopbank
Whakatane river basin			New Zealand	R	100				3	Britton (2008)	Institutional report	Management strategy of 2009
	Auckland		New Zealand	C	100				3	Kench, as in Linham and Nicholls (2010)	Personal communication	The authors in turn cite a personal communication
	Christchurch		New Zealand	R	450				3	van Kalken et al. (retrieved on Dec. 2014)	Technical report	Protection from the local hazard: Waimakariri river
	Blenheim		New Zealand	R	50				3	Marlborough District Council (retrieved on Dec. 2014)	Technical report
	Wanganui		New Zealand	R	50				3	Horizons Regional Council (retrieved on Dec. 2014)	Institutional website	Stopbanks
Wairau (below Waihopai)			New Zealand	R	100				3	Marlborough District Council (retrieved on Dec. 2014)	Institutional website
	Lagos		Nigeria	C	1000				3	Eko Atlantic (retrieved on Feb 2015) http://www.ekoatlantic.com/developing/great-wall-of-lagos/	Corporate website	Great wall of Lagos, 8 km of sea wall
	Sur		Oman	C	10000				2	http://main.omanobserver.om/?p=4889	Newspaper article	New Fulaij Dam (Protection Against Flood Risks in the Wilayat of Sur), started 2013, by Royal Decree No 73/2012
			Poland WHOLE
			Poland	R			200		3	World bank, 2007	Technical report	for first class structures (Polish government regulations, as from the World Bank ref
			Poland	R/C			100		2	Water law 2011 (as retrieved from the STARFLOOD project http://www.starflood.eu/documents/2013/06/flood-risk-management-in-europe-similarities-and-differences-between-the-star-flood-consortium-countries.pdf)	Project website	General prescription for areas of particular social, economic, or cultural importance
	Wroclaw		Poland	R	500				3	Kundzewicz, 1997	Technical report
	Wroclaw		Poland	R	1000				3	Jha et al., 2012	Specialist book	Modernization of the existing floodway system (standard was 200-years). It includes polders, diversion channels. Protects the city and the surrounding towns, total 2.5 M people.
			Romania (rural)	R			20		2	van Alphen and Lodder (2006)	Journal article
			Romania (urban)	R			50		2	van Alphen and Lodder (2006)	Journal article	Hydropower plants are protected with a 100 standard
	St. Petersburg		Russia	R/C	10000				3	Hunter, 2012	Technical report	The Barrier: Saint Petersburg Flood Prevention Facility Complex
	St. Petersburg		Russia	?	1000	10000			3	Whitelaw (2009)	Newspaper article	Flood barrier
			Singapore WHOLE	C	1000	2000			2	Nicholls, personal communication (2010)	Personal communication
			Singapore	R/C	5				3	Expert Panel on Drainage Design and Flood Protection Measures (2012)	Technical report	Drainage system design
		Pulau Tekong polder	Singapore	C	50000				2	Arno Rozing, Deltares	Personal communication	Island in Singapore
			Slovak Republic	R			10	100	3	Solin (2015)	Journal article	Regulation No. 313/2010, assigning different standards depending on the land use and economic importance
Morava			Slovak Republic	R	100				2	Ceframe (retrieved Mar. 2015)	Technical report	Plus freeboard
			South Africa	R/C			50	100	3	CSIR (2000)	Institutional report	Requirement to insert the 1-in-100 year flood lines on all new developments, in the National Water Act 36 of 1998
	Durban		South Africa	C	50	500			2	Mather, as in Linham and Nicholls (2010)	Personal communication	The authors in turn cite a personal communication
			Spain (general)	R/C	NA		0					No info retrievable even in spanish: likely no country-scale protection standards
Júcar basin (urban)			Spain	R			100	250	3	PLAN GLOBAL FRENTE A INUNDACIONES EN LA RIBERA DEL JÚCAR: PROPUESTA DE ACTUACIÓN: http://www.chj.es/es-es/ciudadano/participacion_publica/Documents/Plan%20Hidrol%C3%B3gico%20de%20cuenca/Plan_Global_Frente_A_Inundaciones_Ribera_Jucar.pdf	Institutional document	Plan, 2000
Júcar basin (rural)			Spain	R			25	50	3	PLAN GLOBAL FRENTE A INUNDACIONES EN LA RIBERA DEL JÚCAR: PROPUESTA DE ACTUACIÓN: http://www.chj.es/es-es/ciudadano/participacion_publica/Documents/Plan%20Hidrol%C3%B3gico%20de%20cuenca/Plan_Global_Frente_A_Inundaciones_Ribera_Jucar.pdf	Institutional document	Plan, 2000
	Ballobar		Spain	R	30				2	Que! (27 Nov. 2010)	Newspaper article	Started in 2010, likely finished.
Argamasilla (city Écija)			Spain	R	500				3	Junta de Andalucia, 2007, Programa operativo de Andalucia 2007-2013, and http://elcorreoweb.es/2010/11/08/las-riadas-por-el-argamasilla-seran-historia-en-ecija-a-partir-de-2012/	Institutional document	Channelling of 3.2 km of river. Consejeria del medio ambiente of the regional government of Andalucia.
			Switzerland (rural)	R			30			Musy et al. (2014)	Specialist Book	Switzerland protection is differentiated per land use
Rhine - from Stein am Rhein to Basel			Switzerland	R	200					te Linde et al. (2011); ICPR (2005)	Journal article	Estimated protection level
	Bangkok metropolitan area		Thailand	R/C	10				2	World Bank (2009b)	Technical report	Under climate change scenarios, from a simulation on the Chao Phraya
	Bangkok		Thailand	R/C	30				2	World Bank (retrieved on Nov. 2014)	Technical report
	Bangkok		Thailand	R	50				2	Nathwani et al. (2009)	Engineering book	Cannot access the source (reported in Linham and Nicholls, 2010)
	Bangpa-In industrial estate (Bangkok)		Thailand	R	100				3	Yanuviriyakul, 2013	Technical report	Earthen dyke with flood wall protecting industrial area. Public/Private.
	Rojana industrial park		Thailand	R	100				2	http://www.thaigia.com/Download/Flood_Protection_Progress/%E0%B8%AA%E0%B8%A7%E0%B8%99%E0%B8%AD%E0%B8%B8%E0%B8%95%E0%B8%AA%E0%B8%B2%E0%B8%AB%E0%B8%81%E0%B8%A3%E0%B8%A3%E0%B8%A1%E0%B9%82%E0%B8%A3%E0%B8%88%E0%B8%99%E0%B8%B0.pdf	Corporate website	Dykes and flood wall protecting industrial area of relevance. Private.
	Tunis		Tunisia	?	45				2	http://www.jica.go.jp/english/our_work/evaluation/oda_loan/economic_cooperation/c8h0vm000001rdjt-att/tunisia01.pdf	Technical report	Greater Tunis Flood Protection. Estimated from the project design (50-year event would entail some inundation but no damage).
			UK WHOLE	R/C			1.25	300	3	DEFRA (1999)	Institutional report	Land-use dependent indicative standards, see table 2.3 (from "Flood defence standards for designated sites" 2006)
			UK (coastal)	C			100		2	Home Office (1954)	Institutional report	Weverley Report on Standards for coastal areas. Generally implemented.
			UK (coastal)	C			200		2	Kite (1997)	Technical report	Minimum design standard for protection
			UK (river)	R			100		2	Kite (1997)	Technical report	Minimum design standard for protection
			UK (river)	R			100		2	Environment Agency (year N.A.)	Institutional website	Minimum governamental design standard for protection of new developments
		Scotland	UK	R/C			100		2	http://www.renfrewshire.gov.uk/wps/wcm/connect/6ff06c7e-9ffa-459c-9e34-344bb46b13a2/pt-af-SafeEnvironmentLP.pdf?MOD=AJPERES&CACHEID=6ff06c7e-9ffa-459c-9e34-344bb46b13a2	Institutional report	Minimum for new flood prevention programs. Scottish executive for flood prevention
		Scotland (land use dependent)	UK	R			<200	1000	2	Scottish planning policy (2010)	Institutional document	Prescribes standards to different land uses and functions
		Northern Ireland (urban with major rivers)	UK	R/C	50	100			2	DARDNI (2013)	Institutional website	Urban with minor(50 years)/major(100years) rivers)
	London		UK	R	1000				3	The Guardian (2009)	Newspaper article	Thames Barrier
	London		UK	C	1000				3	Risk & Policy Analysts Limited (2006)	Technical report	Against tidal flooding
	Dumfries and Galloway		UK	?	75				3	http://www.dumgal.gov.uk/index.aspx?articleid=8937	Institutional website	Whitesands Flood Protection Scheme project, complete
	Dumfries and Galloway		UK	R/C	5	200			3	Scottish executive (2007)	Institutional report	Protection projects from the 60's, reassessed in 2007
	Glasgow		UK	R/C	200				3	Scottish executive (2007)	Institutional report	Protection projects from the 60's, reassessed in 2007
	Glasgow / river Clyde		UK	R	200				3	Glasgow City Council (2006)	Institutional report	2006 plan: River Clyde flood management strategy
	Aberdeen		UK	R	100				3	Scottish executive (2007)	Institutional report	Protection projects from the 60's, reassessed in 2007
	Aberdeenshire		UK	R	10				3	Scottish executive (2007)	Institutional report	Protection projects from the 60's, reassessed in 2007
	Angus		UK	R	10	1000			3	Scottish executive (2007)	Institutional report	Protection projects from the 60's, reassessed in 2007
	Argyll & Bute		UK	R	100				3	Scottish executive (2007)	Institutional report	Protection projects from the 60's, reassessed in 2007
	East Ayrshire		UK	R	100				3	Scottish executive (2007)	Institutional report	Protection projects from the 60's, reassessed in 2007
	East Dumbartonshire		UK	R	100				3	Scottish executive (2007)	Institutional report	Protection projects from the 60's, reassessed in 2007
	East Lothian		UK	R	200				3	Scottish executive (2007)	Institutional report	Protection projects from the 60's, reassessed in 2007
	Fife		UK	R	5	200			3	Scottish executive (2007)	Institutional report	Protection projects from the 60's, reassessed in 2007
	Highland		UK	R	200				3	Scottish executive (2007)	Institutional report	Protection projects from the 60's, reassessed in 2007
	Highlands		UK	R	100				3	Scottish executive (2007)	Institutional report	Protection projects from the 60's, reassessed in 2007
	Inverclyde		UK	R	2				3	Scottish executive (2007)	Institutional report	Protection projects from the 60's, reassessed in 2007
	Moray		UK	R	200				3	Scottish executive (2007)	Institutional report	Protection projects from the 60's, reassessed in 2007
	North Ayrshire		UK	R	250				3	Scottish executive (2007)	Institutional report	Protection projects from the 60's, reassessed in 2007
	Perth & Kinross		UK	R	30	250			3	Scottish executive (2007)	Institutional report	Protection projects from the 60's, reassessed in 2007
	Renfrewshire		UK	R	50	1000			3	Scottish executive (2007)	Institutional report	Protection projects from the 60's, reassessed in 2007
	Renfrewshire (urban)		UK	R			200	500	2	http://www.renfrewshire.gov.uk/wps/wcm/connect/6ff06c7e-9ffa-459c-9e34-344bb46b13a2/pt-af-SafeEnvironmentLP.pdf?MOD=AJPERES&CACHEID=6ff06c7e-9ffa-459c-9e34-344bb46b13a2	Institutional report	Plans of the city council
	Stirling		UK	R	25				3	Scottish executive (2007)	Institutional report	Protection projects from the 60's, reassessed in 2007
	West Lothian		UK	R	200				3	Scottish executive (2007)	Institutional report	Protection projects from the 60's, reassessed in 2007
	Hull		UK	R	200				3	Environmental Agency (2008)	Institutional report	Not specified
Humber river			UK	R	5	200			3	Environmental Agency (2008)	Institutional report	Very detailed characterization of the different protection standards in the inhabited areas along the river
River Wansbeck			UK		140				3	http://www.northumberland.gov.uk/default.aspx?page=15716	Institutional website	"Morpeth Flood Alleviation Scheme": Reservoir + new and heightened dykes
			USA WHOLE	R/C			100		1	https://training.fema.gov/EMIWeb/edu/docs/hazrm/Handout%203-5.pdf	Institutional report	General new agreement for new projects
			USA WHOLE	R/C			500		3	FEMA (2013)	Institutional report	New indication to federal agencies, for new federal investments.
	Auburn, New York		USA	R	100				3	http://www.dec.ny.gov/docs/water_pdf/fcpprjauburn.pdf	Institutional website
	Ithaca, New York		USA	R	100				3	http://www.dec.ny.gov/docs/water_pdf/fcpprjithaca.pdf	Institutional website
	New York		USA	C			100		2	Nicholls et al. (2008)	Technical report	Not clear where the authors get the info from
	Miami		USA	C	100				1	Flynn, as in Linham and Nicholls (2010)	Personal communication	The authors in turn cite a personal communication
	New Orleans		USA	C	100				2	USACE (2010), as reported in Linham et al. (2010)	Not available	Cannot access the source
	Virginia Beach		USA	C	7	140			1	Roehrs, as in Linham and Nicholls (2010)	Personal communication	The authors in turn cite a personal communication
	Sacramento		USA	R	200				3	water-technology.net (retrieved Feb 2015)	Technical webpage	Folsom Dam Joint Federal Project to increase the Dam's protection standard by an auxiliary spillway
lower Genesee River			USA	R	300				3	USACE website (retrieved Feb 2015)	Project website	Mount Morris Dam to protect the lower Genesee River valley
Santa Ana river by San Bernardino			USA	R	350				3	San Bernardino county website (retrieved Feb 2015)	Institutional website	Seven Oaks Dam, for flood protecton to the Orange, Riverside and San Bernardino Counties. Part of a system of flood protection for the whole urbanized region, together with the Prado Dam and other measures.
Upper Mississipi (rural)			USA	R	10	50			3	Lovelace and Strauser (1996)	Technical report	System of 60 reservoirs and 1,600 levees
Upper Mississipi (urban)			USA	R	100				2	Lovelace and Strauser (1996)	Technical report	Urban levees and floodwalls. 100 is an estimation from the source
	Hanoi		Vietnam	R	120				2	World bank, 2009a	Technical report	Prevention probability is 0.8%, but plans are for 0.4 and then 0.2%
	Ho Chi Minh City		Vietnam	R/C	0				3	VCAPS (2013)	Technical report	The city is flooded yearly
Mekong			Vietnam	R/C	10				3	World bank, 2011	Technical report	40 km NH1 highway stretchin the very South of the country, between Can Tho and Nam Can (see ref map for detail)
			Europe (residential)	?			50	200	1	Kundzewicz, 2003	Technical report	Residential general
			Europe (agricultural)	?			2	25	1	Kundzewicz, 2003	Technical report	Agricultural general

## Sheet: References
Agarwal, P.K., Singh V.P. (2007), Hydrology and Water Resources of India. Springer. 1303 pages.
Arlington_Group (2010), Flood Protection Strategies in British ColumbiaRep.
Asian Development Bank (2002), Project Completion Report on the Dhaka Integrated Flood Protection Project. Manila: Asian Devlopment Bank.
Barros, V., et al. (2008), Storm surges, rising seas and flood risks in metropolitan Buenos Aires in Leary, N., Conde, C., Kulkarni, J., Nyong, A. and Pulhin, J. (eds). Climate Change and Vulnerability. London: Earthscan, p 117-134.
Bennett S., M. H., and D. McLean (1994), Initial Environmental Evaluation, Appendix to the Northeast Regional Water Management Plan, Bangladesh Flood Action Plan 6Rep., NERP FAP-6.
Bonacci, O., and I. Ljubenkov (2008), Changes in flow conveyance and implication for flood protection, Sava River, Zagreb, Hydrological Processes, 22(8), 1189-1196.
Britton (2008), Whakatane Waimana Floodplain Management Strategy - Stage 1. http://www.boprc.govt.nz/media/33067/Report-0809-FinalWWFMStrategy.pdf
Calbick et al. (2004) Fraser River Basin Case Study. British Columbia, Canada. http://siteresources.worldbank.org/INTSAREGTOPWATRES/Resources/Canada_Fraser_BasinFINAL.pdf
Carmo Vaz, A. (2000), Coping with Floods – The Experience of Mozambique. 1st WARFSA/WaterNet Symposium: Sustainable Use of Water Resources, Maputo, 1-2 November 2000. http://www.google.nl/url?sa=t&rct=j&q=&esrc=s&source=web&cd=15&ved=0CEUQFjAEOAo&url=http%3A%2F%2Fipcc-wg2.gov%2Fnjlite_download.php%3Fid%3D6931&ei=idzoU96XBInmywOfy4KQCw&usg=AFQjCNGqriolCatiyqlq4M--xgcue2Y2VA&sig2=Q7-rRCbrOtbkSJ5Vsl…
Ceframe (retrieved March 2015), Current standards for flood protection http://www.central2013.eu/fileadmin/user_upload/Downloads/outputlib/CEframe_363_Current_standards_for_flood_protection.pdf
Chan, F. K., Mitchell, G., Cheng, X., Adekola, O., & Mcdonald, A. (2013), Developing a Sustainable Flood Risk Appraisal (SFRA) Framework for the Pearl River Delta. Retrieved May 5, 2014, from the Sage Journals database. Environment and Urbanization Asia , 4(2), 301-323. http://www.epd.gov.hk/eia/register/report/eiareport/eia_1892010/HTML/EIA%20Report/Volume%20II%20-%20Figure/0101759_Figure%201.1.…
Chen, F. (2014), Critical issues of strengthen of floodwall in Shanghai [in Chinese]. Advances in Science and Technology of Water Resources, 34(6), pp 49-55
China International Engineering Consulting Corporation (2003), An evaluation report of the feasibility of construction of hydraulic structures in the Huangpu River [in Chinese]. Beijing
China ministry of water resources (2005), Flood Control in the Yangtze River Basin. Retrieved on November 2014 https://www.ehs.unu.edu/file/get/3632
Chinese Government (retrieved November 2014), http://english.gov.cn/2006-05/20/content_286525.htm confirmed from China medias as in http://en.wikipedia.org/wiki/Three_Gorges_Dam#Floods.2C_agriculture.2C_industry
City of Copenhagen (2012), Cloudburst Management Plan. http://kk.sites.itera.dk/apps/kk_pub2/pdf/1019_81lSkHGSvS.pdf. Retrieved in November 2014
City of Vancouver Community Services (2007), Flood Proofing Policies. Vancouver: City of Vancouver Community Services.
Cooke, I., Maguire, A.D., McManus, O. and Bliek, B. (2005), The Dublin Coastal Protection Project. in Brebbia, C.A. and Da Conceicao Cunha, M. Coastal Engineering VII. Southampton: WIT, 245-260.
Copenhagen (2011), COPENHAGEN CLIMATE ADAPTATION PLAN: http://landartgenerator.org/2014img/Copenhagen-climate-plan.pdf
CSIR, Council for Scientific and Industrial Research (2000) , Guidelines for Human Settlement Planning and Design (The Red Book). CSIR, Pretoria, South Africa. Available at: http://www.csir.co.za/Built_environment/RedBook/ (June 2015)
DARDNI (2013), Department of Agriculture and Rural Development. Rivers and Flood Management. http://www.dardni.gov.uk/index/rivers/rivers-and-flood-management.htm
Defra (1999), Flood and Coastal Defence Project Appraisal Guidance Economic Appraisal, FCDPAG3, December 1999.
Deltaprogramma (2015), Deltaprogramma 2015. Werk aan de delta. De beslissingen om Nederland veilig en leefbaar te houden.
DKI Jakarta (2009), Review Masterplan Pengendalian Banjir dan Drainase, Dinas Pekerjaan Umum DKI Jakarta. https://bebasbanjir2025.wordpress.com/konsep-pemerintah/dinas-pu-dki-jakarta-2-3/
Drainage Services dept. of Hong Kong (retrieved November 2014), http://www.dsd.gov.hk/EN/Flood_Prevention/Flood_Prevention_Strategy/Flood_Protection_Standards/index.html
RISK & POLICY ANALYSTS LIMITED (2006), Flood defence standards for designated sites. English Nature Research Reports, No 629. (Retrieved at: http://www.google.nl/url?sa=t&rct=j&q=&esrc=s&source=web&cd=70&ved=0CGoQFjAJODw&url=http%3A%2F%2Fpublications.naturalengland.org.uk%2Ffile%2F71028&ei=ekPzU7KGF4aMOPz1gaAC&usg=AFQjCNF8OGMSiVaBYGucBQNVKDY3KJQMgA&sig2=Ps86oW6Bh-WOsaCAiaq2kw)
Environment Agency (year N.A.), Retrieved at : http://www.sedgemoor.gov.uk/media/pdf/g/p/Guidance_Note_on_Flood_Risk_Assessments.pdf (June 2015)
Environmental Agency (2008), The Humber Flood Risk Management Strategy. https://www.gov.uk/government/uploads/system/uploads/attachment_data/file/308278/Humber_strategy1.pdf
EU OURCOAST Project (retrieved in November 2014), http://ec.europa.eu/ourcoast/print.cfm?articleID=9
European Commission (2009), The economics of climate change adaptation in EU coastal areas: http://ec.europa.eu/maritimeaffairs/documentation/studies/documents/report_en.pdf
Expert Panel on Drainage Design and Flood Protection Measures (2012), Report on Key Conclusions and Recommendations of the Expert Panel on Drainage Design and Flood Protection Measures. https://app.mewr.gov.sg/data/ImgCont/1524/Expert_Panel_Report_on_Drainage_Design_and_Flood_Protection_Measures.pdf
FEMA, Federal Emergency Management Agency (2013), Federal Flood Risk Management Standard. retrieved at: http://www.fema.gov/media-library-data/1422649643416-c0ff9e51d11442790ab18bae8dc5df4b/Federal_Flood_Risk_Management_Standard.pdf (June 2015)
Fioravanti, Máximo (2013), Foro de la Ingeniería del Centro Argentino de Ingeniero. 31 October 2013. http://revistavial.com/index.php/publicaciones/2014/vial-95/item/1928-las-inundaciones-en-la-ciudad-de-buenos-aires
Floodmaster intranet (retrieved November 2014), http://intranet.floodmaster.de/wiki/test99
Galloway, G. E., G. B. Baecher, D. Plasencia, K. G. Coulton, J. Louthain, M. Bagha and A. R. Levy (2006), Assessing the Adequacy of the National Flood Insurance Program's 1 Percent Flood StandardRep., Water Policy Collaborative, University of Maryland.
Glasgow City Council (2006), River Clyde Flood Management Strategy. https://www.glasgow.gov.uk/CHttpHandler.ashx?id=2140&p=0
Greater Wellington Regional Council (retrieved on November 2014), http://www.gw.govt.nz/assets/Our-Services/Flood-Protection/Waikanae-River/JCPSBconstructionNewsletter1.pdf
Hallegatte, S., et al. (2011), Assessing climate change impacts, sea level rise and storm surge risk in port cities: a case study on Copenhagen. Climatic Change 104(1): 113-137.
Hallegatte, S., et al., (2008), Assessing Climate Change Impacts, Sea Level Rise and Storm Surge Risk in Port Cities, OECD Publishing.
Hilpert, K., et al. (2007), Towards Climate Change Adaptation in the Baltic Sea Region, Geological survey of Finland.
Home Office (1954), Report of the Departmental Committee on Coastal Flooding (The Waverley Report), HMSO: London.
Hong Kong Government (retrieved November 2014), http://www.epd.gov.hk/eia/register/report/eiareport/eia_1892010/HTML/EIA%20Report/Volume%20I%20-%20Report/0101759_EIA%201%20Introduction.htm
Horizons Regional Council (retrieved on December 2014), http://www.horizons.govt.nz/assets/About-Us-2/Rates/201124Wanganui-Rates-FactsheetFINAL.pdf
Huang, W. C., Yu, H. W. & Weng, M. C. (2015), Levee reliability analyses for various flood return periods &ndash; a case study in Southern Taiwan. Nat. Hazards Earth Syst. Sci. Discuss. 3, 457-495, doi:10.5194/nhessd-3-457-2015.
Hunter (2012), The St Petersburg Flood Protection Barrier: design and construction. http://eprints.hrwallingford.co.uk/603/1/HRPP569_The_St_Petersburg_Flood_Protection_Barrier_-_Design_and_Construction.pdf
ICPR (2005), Action Plan on Floods. Kurzfassung Bericht Nr. 156Rep., International Commission on the Protection of the Rhine, Koblenz, Germany.
Indonesian Minister of Public Works (2014), PERATURAN MENTERI PEKERJAAN UMUM NOMOR 12/PRT/M/2014 TENTANG PENYELENGGARAAN SISTEM DRAINASE PERKOTAAN http://www.pu.go.id/uploads/services/infopublik20141219102216.pdf
Jan Meerman, John McGill, Marion Cayetano (2011), Belize National Land Use Policy for Land Resource Development.
Jha, A., Bloch, R. and Lamond, J. (2012), Cities and flooding: A guide to integrated urban flood risk management for the 21st Century. Bristol, University of the West of England.
Kazama et al. (2010), Evaluating the cost of flood damage based on changes in extreme rainfall in Japan. In: Sumi et al. (2010) Adaptation and Mitigation Strategies for Climate Change. http://books.google.nl/books?id=G5t-pERT12IC&pg=PA16&lpg=PA16&dq=protection+%22return+period%22+flood&source=bl&ots=TEWkI40Frg&sig=yfabRGGhx0PlZqoKWn9AWOX3cc4&hl=en&sa=X&ei=CYLsU5qcOIipOoqugfAD&ved=0CGQQ6AEwCQ#v=on…
Ke, Q. (2014), Flood risk analysis for metropolitan areas - a case study for Shanghai. Doctoral thesis. Technische Universiteit Delft.
Kite (1997), Real-time Flood Warning and Risk Mitigation: EXPECTING THE UNEXPECTED. In: Ribamod. River basin modelling, management and flood mitigation. Concerted action. European Commission
Kundzewicz, Z. W. (1997), Destructive flood in Poland: Odra, summer 1997, in Proceedings Ribamoc: River basin modelling, management and flood mitigation concerted action, Padua, Italy.
Kundzewicz, Z. W. (2003), Floods and flood protection: business-as-usual? , in Proceedings UNESCO/1AHS/IWI1A symposium, Rome.
Lehtonen, S. And Luoma, S. (2006), Incorporating sea level rise scenarios in Helsinki city planning in Schmidt-Thomé. Sea Level Change Affecting the Spatial Development in the Baltic Sea Region. Espoo: Geological Survey of Finland, 83-94.
Linham M., Nicholls R. (2010), Technologies for climate change adaptation - Coastal erosion and flooding -. TNA Guidebook series. UNEP. ISBN: 978-87-550-3855-4. November 2010
Linham M., Green C., Nicholls R. (2010), Costs of adaptation to the effects of climate change in the world’s large port cities. Work stream 2, Report 14 of the AVOID programme.
Lovelace and Strauser (1996), PERCEPTION AND REALITY CONCERNING THE 1993 MISSISSIPPI RIVER FLOOD: AN ENGINEERS' PERSPECTIVE http://mvs-wc.mvs.usace.army.mil/papers/paper1/paper1.html
Manitoba Government (retrieved November 2014), http://www.gov.mb.ca/flooding/fighting/floodway.html
Marlborough District Council (retrieved on December 2014), http://www.marlborough.govt.nz/Council-Publications/Plans-Policies-and-Documents/~/media/Files/MDC/Home/Your%20Council/Plan%20and%20Reports/Annual%20Plan/2013/AnnualPlan201314CouncilActivities1.ashx
Ministry of Water Resources of China (2001), Comments for flood prevention in Taihu Basin area [in Chinese]. http://www.gov.cn/gongbao/content/2002/content_61563.htm
Ministry of transport, public works and water management (2010), Water law.
van der Most, H., I. Tánczos, K.M. de Bruijn, D. Wagenaar (2014), NEW, RISK-BASED STANDARDS FOR FLOOD PROTECTION IN THE NETHERLANDS. https://www.deltares.nl/app/uploads/2014/12/ICFM6-PAP014759-Flood-protection-standards-def1.pdf
Musy A., B. Hingray, C. Picouet (eds) (2014), Hydrology: A Science for Engineers. 592 pp. CRC Press. ISBN 9781466590595.
Nathwani, J.S., Pandey, M.D. and Lind, N.C. (2009), Engineering Decisions for Life Quality: How Safe is Safe Enough? London: Springer.
New Zealand Government (retrieved on November 2014), http://www.gw.govt.nz/assets/Our-Services/Flood-Protection/Hutt/Hutt-Haz-Maps/Hutt-River-Flood-and-Erosion-Hazard-Information-Sheet-1.pdf
Nicholls, R.J., Hanson, S., Herweijer, C., Patmore, N., Hallegatte, S., Corfee-Morlot, J., Château, J. and Muir-Wood, R. (2008), “Ranking Port Cities with High Exposure and Vulnerability to Climate Extremes.” OECD Environment Working Papers, No 1.
North Vancouver District (retrieved November 2014), http://www.dnv.org/article.asp?a=4890
Oda, Hideaki (2005), Japan Water Forum, Tokyo and Nagoya, personal communication. December 14-15, 2005.
O'Donovan (2014), Waterford City Flood Alleviation Scheme. https://www.engineersireland.ie/EngineersIreland/media/SiteMedia/cpd/training/Seminars%20temp/Flood%20Risk%20Management/4-Gavin-O-Donovan-Paper.pdf
Povodí Vltavy (2007), Plán oblasti povodí Dolní Vltavy. (Plan of the Lower Vltava river basin district). On-line. URL:< http://www.pvl.cz/portal/hydroprojekt/VD/index.html>. Accessed on 22-09-2014.
Povodí Vltavy (2007b), Plán oblasti povodí Dolní Vltavy. (Plan of the Lower Vltava river basin district). On-line. URL:< http://www.pvl.cz/portal/hydroprojekt/VD/index.html>. Accessed on 22-09-2014.
Province of British Columbia (1999), Guidelines for Management of Flood Protection Works in British Columbia. http://www.env.gov.bc.ca/wsd/public_safety/flood/pdfs_word/gd_mgt_fld_pro_bc.pdf
Que! (27 Novembre 2010), http://www.que.es/zaragoza/201011271029-autoriza-informacion-publica-proyecto-mejora-epi.html
Red river basin commission (2010), Level of Flood Protection Goals. http://www.redriverbasincommission.org/Long_Term_Flood_Solutions/Level_of_Flood_Protection_Goals_5_6_2010.pdf
Risk & Policy Analysts Limited (2006), Flood defence standards for designated sites. English Nature Research Reports, No 629. (Retrieved at: http://www.google.nl/url?sa=t&rct=j&q=&esrc=s&source=web&cd=70&ved=0CGoQFjAJODw&url=http%3A%2F%2Fpublications.naturalengland.org.uk%2Ffile%2F71028&ei=ekPzU7KGF4aMOPz1gaAC&usg=AFQjCNF8OGMSiVaBYGucBQNVKDY3KJQMgA&sig2=Ps86oW6Bh-WOsaCAiaq2kw)
SAFECOAST (2008), COASTAL FLOOD RISK AND TRENDS FOR THE FUTURE IN THE NORTH SEA REGION. G. B. Niels Roode, John Ash, Rocio Salado. The Hague, Safecoast project team: 136.
San Bernardino County website (retrieved February 2015), http://www.sbcounty.gov/dpw/floodcontrol/sevenOaks.asp
Sächsisches Staatsministerium für Umwelt und Landwirtschaft (2005), Ergebnisse der landesweiten Priorisierung von Hochwasserschutzmaßnahmen
SatriaMarsudi, A. (retrieved on March 2015), https://www.academia.edu/8424029/Studi_Penentuan_Control_Water_Level_Maksimum_Waduk_Sutami_dan_Lahor_Sebagai_Upaya_Pengelolaan_Risiko_Bendungan_di_Wilayah_Sungai_Brantas
Scottish executive (2007), SCOTTISH FLOOD DEFENCE ASSET DATABASE. http://www.scotland.gov.uk/Resource/Doc/195446/0052419.pdf
Scottish planning policy (2010), http://www.scotland.gov.uk/Resource/Doc/300760/0093908.pdf
Shamir, Uri (2005), Technion-Israel Institute of Technology. Personal communication. January 5,
Shangai Water Authority (retrieved March 2016), http://222.66.79.122/BMXX/default.htm?GroupName=%C7%A7%C0%EF%BD%AD%B5%CC (in Chinese)	Shangai Water Authority (retrieved March 2016)	Shangai Water Authority (retrieved March 2016)	Shangai Water Authority (retrieved March 2016)	Shangai Water Authority (retrieved March 2016)	Shangai Water Authority (retrieved March 2016)	Shangai Water Authority (retrieved March 2016)	Shangai Water Authority (retrieved March 2016)	Shangai Water Authority (retrieved March 2016)	Shangai Water Authority (retrieved March 2016)	Shangai Water Authority (retrieved March 2016)	Shangai Water Authority (retrieved March 2016)	Shangai Water Authority (retrieved March 2016)	Shangai Water Authority (retrieved March 2016)	Shangai Water Authority (retrieved March 2016)	Shangai Water Authority (retrieved March 2016)	Shangai Water Authority (retrieved March 2016)	Shangai Water Authority (retrieved March 2016)	Shangai Water Authority (retrieved March 2016)	Shangai Water Authority (retrieved March 2016)	Shangai Water Authority (retrieved March 2016)	Shangai Water Authority (retrieved March 2016)	Shangai Water Authority (retrieved March 2016)	Shangai Water Authority (retrieved March 2016)	Shangai Water Authority (retrieved March 2016)	Shangai Water Authority (retrieved March 2016)	Shangai Water Authority (retrieved March 2016)	Shangai Water Authority (retrieved March 2016)	Shangai Water Authority (retrieved March 2016)	Shangai Water Authority (retrieved March 2016)	Shangai Water Authority (retrieved March 2016)	Shangai Water Authority (retrieved March 2016)	Shangai Water Authority (retrieved March 2016)	Shangai Water Authority (retrieved March 2016)	Shangai Water Authority (retrieved March 2016)	Shangai Water Authority (retrieved March 2016)	Shangai Water Authority (retrieved March 2016)	Shangai Water Authority (retrieved March 2016)	Shangai Water Authority (retrieved March 2016)	Shangai Water Authority (retrieved March 2016)	Shangai Water Authority (retrieved March 2016)	Shangai Water Authority (retrieved March 2016)	Shangai Water Authority (retrieved March 2016)	Shangai Water Authority (retrieved March 2016)	Shangai Water Authority (retrieved March 2016)	Shangai Water Authority (retrieved March 2016)	Shangai Water Authority (retrieved March 2016)	Shangai Water Authority (retrieved March 2016)	Shangai Water Authority (retrieved March 2016)	Shangai Water Authority (retrieved March 2016)
Sichuan Government (2011), Master plan of Chengdu City between the year of 2011 and 2020 [In Chinese]. Private report. http://scnews.newssc.org/system/20151207/000627008.html
Silva, W. a. V. V., E. (2008), De dijk van de toekomst?, Quick scan Doorbraakvrije dijkenRep., Ministry of Transport, PublicWorks and Water Management, The Hague, the Netherlands.
Smith, D. (2004), Shortcomings in the 1% Chance Flood Standard. Background Paper. Gilbert F. White National Flood Policy Forum, September 21-22, 2004, Washington, DC.
Solín, Ľ. (2015), Recent Slovak flood protection relative to integrated flood risk management, International Journal of River Basin Management, 1-11.
Taipei city government (2001), Report of investigations into measures for the reduction of the disasters in Taipei city after typhoon Nari. Appendix C, Flood disaster analysis (in Chinese). As in: Teng WH, Hsu MH, Wu CH, and Chen AS (2006). Impact of flood disasters on Taiwan in the last quarter century. Natural Hazards, 37(1-2), 191-207, DOI: 10.1007/s11069-005-4667-7
te Linde, A. H., P. Bubeck, J. E. C. Dekkers, H. de Moel, and J. C. J. H. Aerts (2011), Future flood risk estimates along the river Rhine, Nat. Hazards Earth Syst. Sci., 11(2), 459-473.
The Guardian (2009), http://www.theguardian.com/environment/2009/mar/31/thames-flood-barrier-london
Tracy, A., Trumbull, K., & Loh, A. (2007), The impacts of climate change in Hong Kong and the Pearl River Delta. Civic Exchange, Hong Kong. Retrieved May 1, 2014, from http://www.hkccf.org/
Tucci, C. E. M. and A. O. N. Villanueva (1999), Flood control measures in União da Vitoria and Porto União: structural vs. non-structural measures. Urban Water 1(2): 177-182.
Tucker, R.et al. (2005), Adelaide's Living Beaches: A Strategy for 2005-2025. Adelaide: Department for Environment and Heritage.
USACE (2010), 100 Year Level of Protection. New Orleans: United States Army Corps of Engineers
USACE (retrieved February 2015), http://www.lrb.usace.army.mil/Missions/Recreation/MountMorrisDam/ProjectHistory.aspx. US Army Corps of Engineers webpage
van Kalken et al. (retrieved on Dec 2014), IMPACTS OF SECONDARY FLOOD EMBANKMENTS ON THE WAIMAKARIRI FLOODPLAIN, NEW ZEALAND http://www.mikepoweredbydhi.com/~/media/Microsite_MIKEbyDHI/Publications/PDF/Waterresources/Waikmak-IAHR-Venice07-lo.ashx
VCAPS (2013), Atlas. Ho Chi Minh City Rep., Vietnam Climate Adaptation PartnerShip (VCAPS)-consortium, Ho Chi Minh City.
Water-technology.net (retrieved on February 2015), http://www.water-technology.net/projects/folsom-dam-joint-federal-project-sacramento/
Wellington Regional Council (retrieved on November 2014), http://www.gw.govt.nz/assets/Our-Services/Flood-Protection/Otaki-River/FP---Otaki-FMP.pdf
Whitelaw J. (2009), http://www.nce.co.uk/news/water/st-petersburg-flood-barrier-russias-priceless-defence/5210144.article
Wikipedia (retrieved March 2015), http://id.wikipedia.org/wiki/Waduk_Ir._Sutami
World Bank (2007), Poland - Odra River Basin Flood Protection Project.
World Bank (2009a), Climate Resilient Cities A primer on Reducing Vulnerabilities to Disasters. http://www-wds.worldbank.org/external/default/WDSContentServer/WDSP/IB/2009/03/19/000334955_20090319060333/Rendered/PDF/478010WP0hanoi1port046680101PUBLIC1.pdf
World Bank (2009b), Climate Change Impact and Adaptation Study for Bangkok Metropolitan Region. http://www-wds.worldbank.org/external/default/WDSContentServer/WDSP/IB/2009/10/06/000333037_20091006001046/Rendered/PDF/508980ESW0v10P1pt1bangkok1report111.pdf
World Bank (2013), CHINA JIANGXI WUXIKOU INTEGRATED FLOOD MANAGEMENT PROJEC: http://www-wds.worldbank.org/external/default/WDSContentServer/WDSP/IB/2013/03/04/000356161_20130304115027/Rendered/PDF/744030PAD0P1280Offiical0Use0Only090.pdf
World Bank (retrieved on Nov 2014), http://www.google.nl/url?sa=t&rct=j&q=&esrc=s&source=web&cd=55&ved=0CEIQFjAEODI&url=http%3A%2F%2Fwww.adpc.net%2Fipcc%2Fpresentations%2Ffiles%2Fbrad_ipcc%2520presentation%2520brp.ppt&ei=9THzU4C0IIiqPOOwgOgC&usg=AFQjCNER4HHBoJ1t4P8O0fxmkCMxGnkxCw&sig2=IhyWyPY5nkej8MleMVSbpg
World Bank (2011), MEKONG TRANSPORT AND FLOOD PROTECTION PROJECT. http://www-wds.worldbank.org/external/default/WDSContentServer/WDSP/IB/2012/03/12/000356161_20120312004606/Rendered/PDF/ICR18160P042920IC0disclosed03080120.pdf
Yanuviriyakul, A. (2013), DESIGN OF NEW FLOOD PROTECTION SYSTEM FOR BANGPA-IN INDUSTRIAL ESTATE: http://www.geoss.sg/documents/18SEAGC_YPS/8_1%29%20Technical%20Paper%20by%20Amnarj_18SEAGC%20YPS.pdf
Yim, W.W.S. (1991), Future sea level rise and coastal land reclamations for urbanization in Hon Kong in Frassetto, R. (ed.). Impact of Sea Level Rise on Cities and regions. Proceedings of the First International Meeting 'Cities on Water', Venice, December 1989. pp 136-142. Marsillo Editori: Venice.
Yim, W.W.S. (1995), Implications of Sea Level Rise for Victoria Harbour, Hong Kong. Journal of Coastal Research, Special Issue 14, 167-189.
Yin, J., et al. (2011), Multiple scenario analyses forecasting the confounding impacts of sea level rise and tides from storm induced coastal flooding in the city of Shanghai, China. Environmental Earth Sciences 63(2): 407-414.
Zhang Hai-Lun (2004), INTEGRATED FLOOD MANAGEMENT. CASE STUDY. CHINA: FLOOD MANAGEMENT: http://www.apfm.info/publications/casestudies/cs_china_full.pdf
Zhang, H. M., W.-C.; Wang, X.-R. (2008), Rapid Urbanization and Implications for Flood Risk Management in Hinterland of the Pearl River Delta, China: The Foshan Study: Sensors, v. 8, p. 2223-2239.
Zhang, Y., and H. Gou (2011), Flood prevention for the cities of Taihu Basin area, Flood and drought Control in China [in Chinese]. pp 44-46
Zurich (2013), https://www.zurich.com.au/content/dam/australia/general_insurance/risk_engineering/australian-storms-and-floods-white%20paper.pdf
Zurich (2014), Risk Nexus. Central European floods 2013: a retrospective. © Zurich Insurance Company Ltd.
[truncated: 5,000 more columns]
