# Supplementary material for: FLOPROS: an evolving global database of flood protection standards
Source: Copernicus journal article supplement (doi:10.5194/nhess-16-1049-2016), 2016-05-03
Supplement: Supplementary file [file nhess-16-1049-2016-supplement-title-page.pdf › nhess-16-1049-2016-supplement-title-page.pdf]

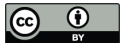

## *Supplement of*

# **FLOPROS: an evolving global database of flood protection standards**

**Paolo Scussolini et al.**

*Correspondence to:* Paolo Scussolini ([paolo.scussolini@vu.nl](mailto:paolo.scussolini@vu.nl))

- nhess-16-1049-2016-supplement-title-page.pdf
- Scussolini\_etal\_Suppl\_info
  - FLOPROS\_Database\_Design\_&\_Policy\_layers\_V1.xlsx
  - FLOPROS\_shp\_V1
    - \* FLOPROS\_shp\_V1.dbf
    - \* FLOPROS\_shp\_V1.prj
    - \* FLOPROS\_shp\_V1.sbn
    - \* FLOPROS\_shp\_V1.sbx
    - \* FLOPROS\_shp\_V1.shp
    - \* FLOPROS\_shp\_V1.shp.xml
    - \* FLOPROS\_shp\_V1.shx
    - \* Readme.txt
  - Supplementary information to the manuscript.docx

The copyright of individual parts of the supplement might differ from the CC-BY 3.0 licence.
